# Supplementary material for: Population Pharmacokinetics and Pharmacodynamics of Vericiguat in Patients with Heart Failure and Reduced Ejection Fraction
Source: PubMed Central journal article supplement — Clin Pharmacokinet. 2021 Jun 4;60(11):1407–21. doi: 10.1007/s40262-021-01024-y (PMC8585847; doi:10.1007/s40262-021-01024-y), 2021-06-04
Supplement: 40262_2021_1024_MOESM1_ESM.pdf [file 40262_2021_1024_MOESM1_ESM.pdf]

## Supplementary Information

### *Clinical Pharmacokinetics*

# Population Pharmacokinetics and Pharmacodynamics of Vericiguat in Patients with Heart Failure and Reduced Ejection Fraction

Hauke Ruehs<sup>1</sup> · Dagmar Klein<sup>1</sup> · Matthias Frei<sup>1</sup> · Joachim Grevel<sup>2</sup> · Rupert Austin<sup>2</sup> · Corina Becker<sup>3</sup> · Lothar Roessig<sup>4</sup> · Burkert Pieske<sup>5,6,7</sup> · Dirk Garmann<sup>1</sup> · Michaela Meyer<sup>1</sup>

1. Pharmacometrics, Bayer AG, Wuppertal, Germany
2. BAST Inc Limited, Loughborough, UK
3. Clinical Pharmacology, Bayer AG, Wuppertal, Germany
4. Clinical Development, Bayer AG, Wuppertal, Germany
5. Department of Internal Medicine and Cardiology, Charité University Medicine, Campus Virchow-Klinikum, German Heart Center, Berlin, Germany
6. German Center for Cardiovascular Research (DZHK), Partner Site Berlin, Germany
7. Berlin Institute of Health (BIH), Berlin, Germany

### **Corresponding author:**

Michaela Meyer. (ORCID ID: 0000-0002-7245-9406)

Email: [michaela.meyer@bayer.com](mailto:michaela.meyer@bayer.com); Tel: +49 202 36-3667.

**Supplementary Fig. 1** Goodness-of-fit plots for the final population PK model

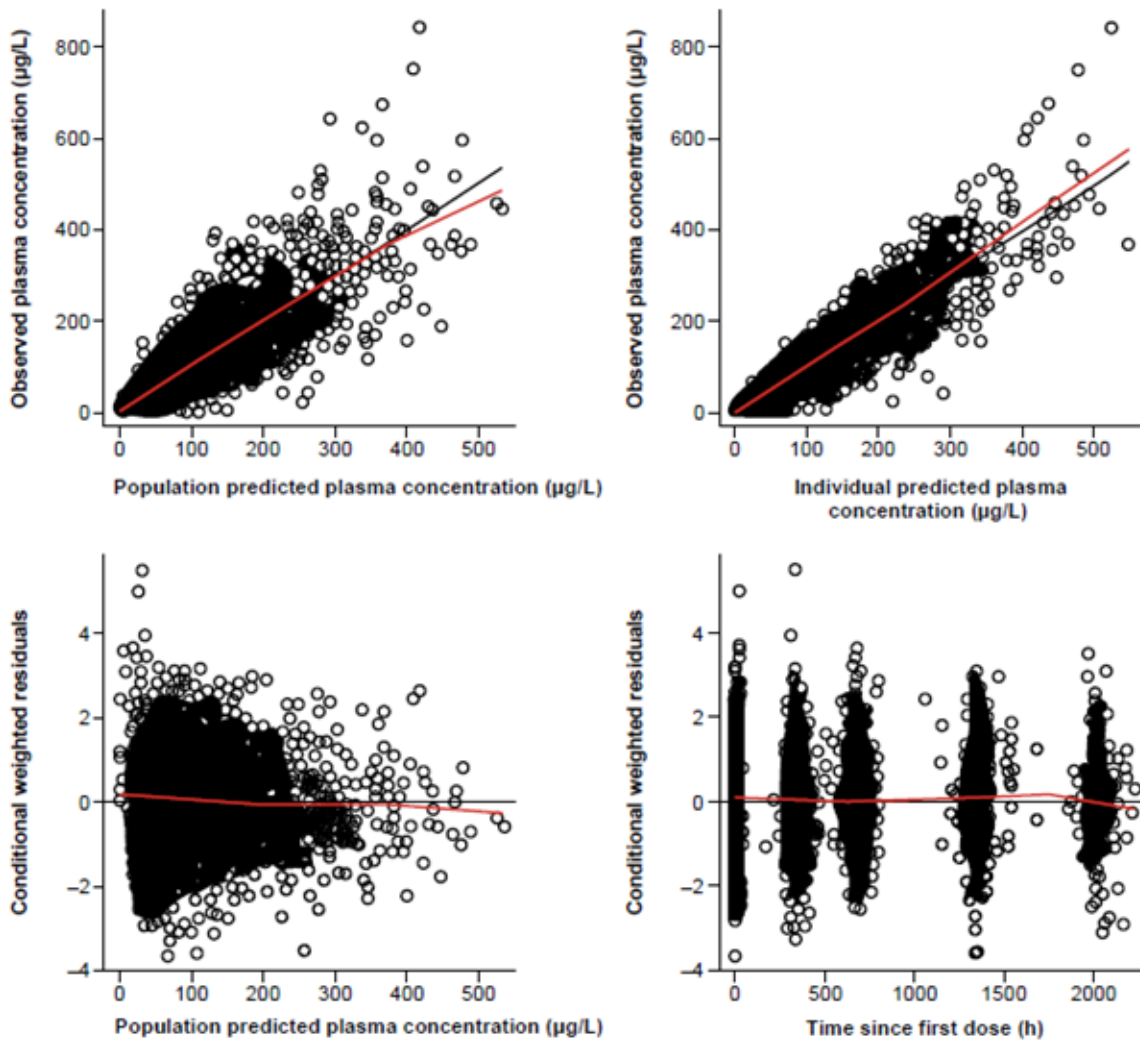

**Supplementary Fig. 2** Forest plots of deterministic simulations visualizing covariate influence on PK exposure (AUC and  $C_{max}$  at steady-state)

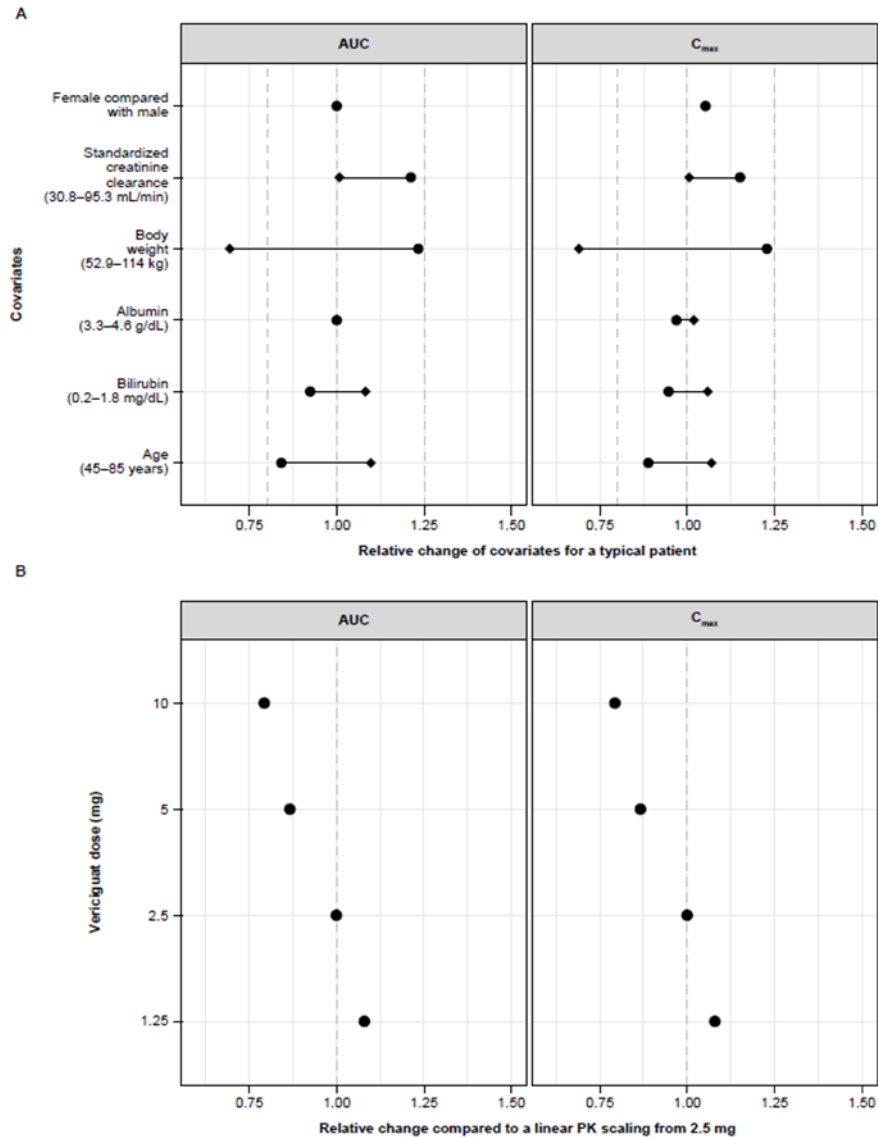

A) Relative change in PK exposure (AUC and  $C_{max}$  at steady state) compared to a typical patient with a daily 2.5 mg vericiguat administration. In the case of continuous covariates, the diamonds indicate the change corresponding to the 95<sup>th</sup> percentile of the covariate and the circles indicate the change corresponding to the 5<sup>th</sup> percentile of the covariate.

B) Relative change in PK exposure (AUC and  $C_{max}$ ) from popPK model with dose-dependence of bioavailability compared with a linear PK scaling from 2.5 mg. Dashed lines indicate the 0.8 and 1.25-fold change.

**Supplementary Table 1** Pharmacokinetic sampling scheme for the population PK analysis

| Measurement        | Sampling scheme    |   |                   |                   |                   |                   |                    |
|--------------------|--------------------|---|-------------------|-------------------|-------------------|-------------------|--------------------|
| Visit              | Screening          | 1 | 2                 | 3                 | 4                 | 5 <sup>c</sup>    | Follow-up          |
| Day/Window         | -28-0 <sup>a</sup> | 0 | 14±2 <sup>b</sup> | 28±2 <sup>b</sup> | 56±2 <sup>b</sup> | 84±2 <sup>b</sup> | +30±5 <sup>d</sup> |
| PK <sup>e</sup>    |                    | x | x                 | x                 | x                 | x                 |                    |
| Blood <sup>f</sup> |                    | x | x                 | x                 | x                 | x                 | x                  |
| BP/HR <sup>g</sup> | x                  | x | x                 | x                 | x                 | x                 | x                  |

*BP* blood pressure, *HR* heart rate

<sup>a</sup>Can start from hospitalization (or equivalent) up to 4 weeks after discharge (or after clinical stabilization upon hospitalization equivalent) and no more than 4 weeks before randomization

<sup>b</sup>Allows for timeframes of 5 days, e.g. visit 2 can take place on days 12–16

<sup>c</sup>Completion or premature discontinuation visit (in case of premature stop of study drug, the same measurements and procedures should be performed as at visit 5)

<sup>d</sup>After last intake of study drug

<sup>e</sup>Blood samples were taken at baseline/trough at Visits 2–4 (prior to study drug) and at Visit 5; at Visits 1 and 3, 1–3 hours and 4–6 hours post-study drug dosing; and at Visits 2 and 4, 1–3 hours post-study drug dosing. Optional additional pre-dose sample on Day 1 (trough 24 hours after first study drug) for hospitalized patients

<sup>f</sup>NT-proBNP, clinical chemistry, hematology, coagulation (prior to drug intake or on visit 5 ~24 hours after last drug intake)

<sup>g</sup>Three measurements, 2 min apart; measurements are taken prior to and at 2h post study-drug dosing

**Supplementary Table 2** Run record of key runs in base model development

| Run name | Parent run | OFV        | $\Delta$ OFV | Comments                                                                                 |
|----------|------------|------------|--------------|------------------------------------------------------------------------------------------|
| 0        | –          | 26,194.906 | n/a          | One-compartment model with first-order absorption, proportional error model, no lag-time |
| 1        | 0          | 26,131.062 | -63.844      | Test of residual error model                                                             |
| 2        | 0          | 26,050.443 | -144.463     | Combined error model                                                                     |
| 3        | 2          | 26,048.332 | -2.111       | Lag-time                                                                                 |
| 4        | 2          | 25,940.152 | -110.291     | Correlation between CL/F and V/F included                                                |
| 5        | 2          | 26,047.805 | -2.638       | Two-compartment model                                                                    |
| 6        | 4          | 25,985.740 | 45.588       | Variability on $k_a$ removed                                                             |

CL/F apparent clearance,  $k_a$  absorption rate constant, OFV objective function value, V/F apparent volume of distribution.

**Supplementary Table 3** Stepwise covariate modeling results

| Run <sup>a</sup> | Covariates included <sup>a</sup>                                                          | Covariate relationship<br>included/eliminated <sup>b</sup>              | $\Delta$ OFV | IIV of         |        |        | Change in IIV of (%) <sup>c</sup> : |        |        |
|------------------|-------------------------------------------------------------------------------------------|-------------------------------------------------------------------------|--------------|----------------|--------|--------|-------------------------------------|--------|--------|
|                  |                                                                                           |                                                                         |              | k <sub>a</sub> | CL/F   | V/F    | k <sub>a</sub>                      | CL/F   | V/F    |
| 0                | –                                                                                         | –                                                                       |              | 0.696          | 0.1300 | 0.0732 |                                     |        |        |
| 1                | –                                                                                         | WGHT on CL/F, exponent fixed: 0.75,<br>WGHT on V/F, exponent fixed: 1.0 | -160.836     | 0.923          | 0.0909 | 0.0504 | 32.60                               | -30.10 | -31.10 |
| 2                | on CL/F: WGHT<br>on V/F: WGHT                                                             | AGE on CL/F                                                             | -46.887      | 0.951          | 0.0775 | 0.0491 | 3.00                                | -14.70 | -2.60  |
| 3                | on CL/F: WGHT, AGE<br>on V/F: WGHT                                                        | BILI on CL/F                                                            | -18.098      | 0.949          | 0.0731 | 0.0485 | -0.20                               | -5.70  | -1.20  |
| 4                | on CL/F: WGHT, AGE, BILI<br>on V/F: WGHT                                                  | ALB on k <sub>a</sub>                                                   | -19.199      | 0.856          | 0.0724 | 0.0485 | -9.80                               | -1.00  | 0.00   |
| 5                | on CL/F: WGHT, AGE, BILI<br>on V/F: WGHT<br>on k <sub>a</sub> : ALB                       | CRCL on CL/F                                                            | -16.064      | 0.856          | 0.0685 | 0.0485 | 0.00                                | -5.40  | 0.00   |
| 6                | on CL/F: WGHT, AGE, BILI,<br>CRCLST<br>on V/F: WGHT<br>on k <sub>a</sub> : ALB            | SEX on V/F                                                              | -15.219      | 0.861          | 0.0686 | 0.0437 | 0.60                                | 0.10   | -9.90  |
| 7                | on CL/F: WGHT, AGE, BILI,<br>CRCLST<br>on V/F: WGHT, SEX<br>on k <sub>a</sub> : ALB       | WGHT on k <sub>a</sub>                                                  | -15.198      | 0.795          | 0.0683 | 0.0400 | -7.70                               | -0.40  | -8.50  |
| 8                | on CL/F: WGHT, AGE, BILI,<br>CRCLST<br>on V/F: WGHT, SEX<br>on k <sub>a</sub> : ALB, WGHT | RACE on V/F                                                             | -10.806      | 0.817          | 0.0679 | 0.0366 | 2.8                                 | -0.6   | -8.5   |

|    |                                                                                                               |                             |          |       |        |       |      |       |     |
|----|---------------------------------------------------------------------------------------------------------------|-----------------------------|----------|-------|--------|-------|------|-------|-----|
| 9  | on CL/F: WGHT, AGE, BILI,<br>CRCLST<br>on V/F: WGHT, SEX, RACE<br>on k <sub>a</sub> : ALB, WGHT               | RACE on V/F<br>(eliminated) | +10.806  | 0.795 | 0.0683 | 0.04  | -2.7 | 0.6   | 9.3 |
| 10 | on CL/F: WGHT, AGE, BILI,<br>CRCLST<br>on V/F: WGHT, SEX, RACE<br>on k <sub>a</sub> : ALB, WGHT<br>on F: DOSE | DOSE on F                   | -126.699 | 0.867 | 0.061  | 0.043 | 9.1  | -10.3 | 7.5 |

---

*ALB* albumin, *BILI* bilirubin, *CL/F* apparent clearance, *CRCLST* standardized creatinine clearance, *IIV* inter-individual variability, *k<sub>a</sub>* absorption rate constant, *RSE*

relative standard error, *V/F* apparent volume of distribution, *WGHT* weight.

<sup>a</sup>Covariate parameter relationships previously included.

<sup>b</sup>Covariate parameter relationships included in the current step, additionally to the previously included relationship or relationships eliminated in the current step, of the relationship included.

<sup>c</sup>Change vs. result of the previous run from the stepwise covariate model development, i.e. as documented in column "IIV of ..."

**Supplementary Table 4** Descriptive statistics of PK estimates of vericiguat (including dose dependency)

| PK parameter                     | Vericiguat dose | n  | Arithmetic mean | Arithmetic std | Geometric mean | Geometric std | Min      | Median   | Max       | 5th percentile | 95th percentile |
|----------------------------------|-----------------|----|-----------------|----------------|----------------|---------------|----------|----------|-----------|----------------|-----------------|
| AUC <sub>T,ss</sub><br>(µg*h/L)  | 1.25            | 68 | 1142.328        | 440.881        | 1069.344       | 1.433         | 507.558  | 1000.559 | 2646.634  | 611.949        | 1850.920        |
|                                  | 2.5             | 71 | 2156.314        | 701.038        | 2053.981       | 1.366         | 1015.985 | 1998.008 | 4251.011  | 1215.585       | 3465.766        |
|                                  | 5               | 64 | 3703.806        | 1220.686       | 3513.932       | 1.39          | 1878.42  | 3668.427 | 7934.754  | 2063.794       | 5908.759        |
|                                  | 10              | 40 | 6588.793        | 2136.623       | 6247.014       | 1.398         | 3375.199 | 6327.505 | 11018.953 | 3471.135       | 10049.354       |
| C <sub>max,ss</sub><br>(µg/L)    | 1.25            | 68 | 63.373          | 21.741         | 60.140         | 1.378         | 28.398   | 55.732   | 137.769   | 37.046         | 100.703         |
|                                  | 2.5             | 71 | 119.732         | 33.872         | 115.505        | 1.305         | 64.948   | 114.708  | 212.901   | 71.921         | 198.263         |
|                                  | 5               | 64 | 203.337         | 58.024         | 195.378        | 1.331         | 112.302  | 205.521  | 374.067   | 126.212        | 307.057         |
|                                  | 10              | 40 | 370.173         | 103.866        | 355.809        | 1.334         | 194.387  | 348.508  | 611.790   | 212.723        | 532.722         |
| C <sub>trough,ss</sub><br>(µg/L) | 1.25            | 68 | 32.313          | 14.797         | 29.437         | 1.535         | 12.662   | 27.838   | 81.906    | 15.769         | 59.820          |
|                                  | 2.5             | 71 | 61.27           | 24.997         | 56.706         | 1.488         | 22.932   | 55.82    | 142.389   | 26.658         | 110.379         |
|                                  | 5               | 64 | 107.225         | 45.007         | 98.428         | 1.529         | 40.522   | 105.169  | 280.943   | 48.310         | 185.855         |
|                                  | 10              | 40 | 180.993         | 73.705         | 166.055        | 1.538         | 69.933   | 176.512  | 343.245   | 78.348         | 314.342         |
| PTR <sub>ss</sub>                | 1.25            | 68 | 2.078           | 0.391          | 2.043          | 1.202         | 1.258    | 2.027    | 3.404     | 1.521          | 2.823           |
|                                  | 2.5             | 71 | 2.082           | 0.458          | 2.037          | 1.233         | 1.300    | 2.022    | 3.784     | 1.457          | 2.818           |
|                                  | 5               | 64 | 2.036           | 0.490          | 1.985          | 1.250         | 1.331    | 1.948    | 3.885     | 1.388          | 2.993           |



|               |      |     |        |       |        |       |        |        |        |        |        |
|---------------|------|-----|--------|-------|--------|-------|--------|--------|--------|--------|--------|
|               | 10   | 40  | 2.190  | 0.483 | 2.143  | 1.233 | 1.444  | 2.110  | 3.453  | 1.519  | 3.241  |
| $t_{1/2}$ (h) | 1.25 | 98  | 21.787 | 5.695 | 21.085 | 1.293 | 10.857 | 21.457 | 41.205 | 13.939 | 32.158 |
|               | 2.5  | 114 | 21.606 | 5.633 | 20.912 | 1.293 | 11.809 | 21.365 | 40.253 | 12.278 | 32.175 |
|               | 5    | 87  | 22.049 | 7.679 | 20.955 | 1.366 | 11.462 | 20.702 | 49.550 | 12.700 | 40.002 |
|               | 10   | 58  | 20.181 | 5.609 | 19.483 | 1.302 | 11.138 | 18.616 | 35.020 | 12.913 | 32.841 |

---

$AUC_{\tau,ss}$  area under the plasma concentration–time curve at steady state,  $C_{max,ss}$  maximum plasma drug concentration at steady state,  $C_{trough,ss}$  trough plasma

concentration at steady state,  $PTR$  peak-to-trough ratio,  $t_{1/2}$  elimination half-life.

**Supplementary Table 5** Linear regression parameter table

|                                                      | Visit 1                | Visit 4                |
|------------------------------------------------------|------------------------|------------------------|
| Intercept (SBP change from pre- to post-dose [mmHg]) | -5.857 ( $p < 0.001$ ) | -5.124 ( $p < 0.001$ ) |
| Slope (vericiguat $C_{max}$ [ $\mu\text{g/L}$ ])     | -0.039 ( $p = 0.047$ ) | –                      |
| Slope (vericiguat $C_{max,ss}$ [ $\mu\text{g/L}$ ])  | –                      | -0.003 ( $p = 0.528$ ) |

$C_{max}$  maximum plasma drug concentration,  $C_{max,ss}$  maximum plasma drug concentration at steady state,  $SBP$  systolic blood pressure.
